# Supplementary material for: CMS: A Web-Based System for Visualization and Analysis of Genome-Wide Methylation Data of Human Cancers
Source: PubMed Central journal article supplement (PMC3632540; doi:10.1371/journal.pone.0060980), 2013-04-22

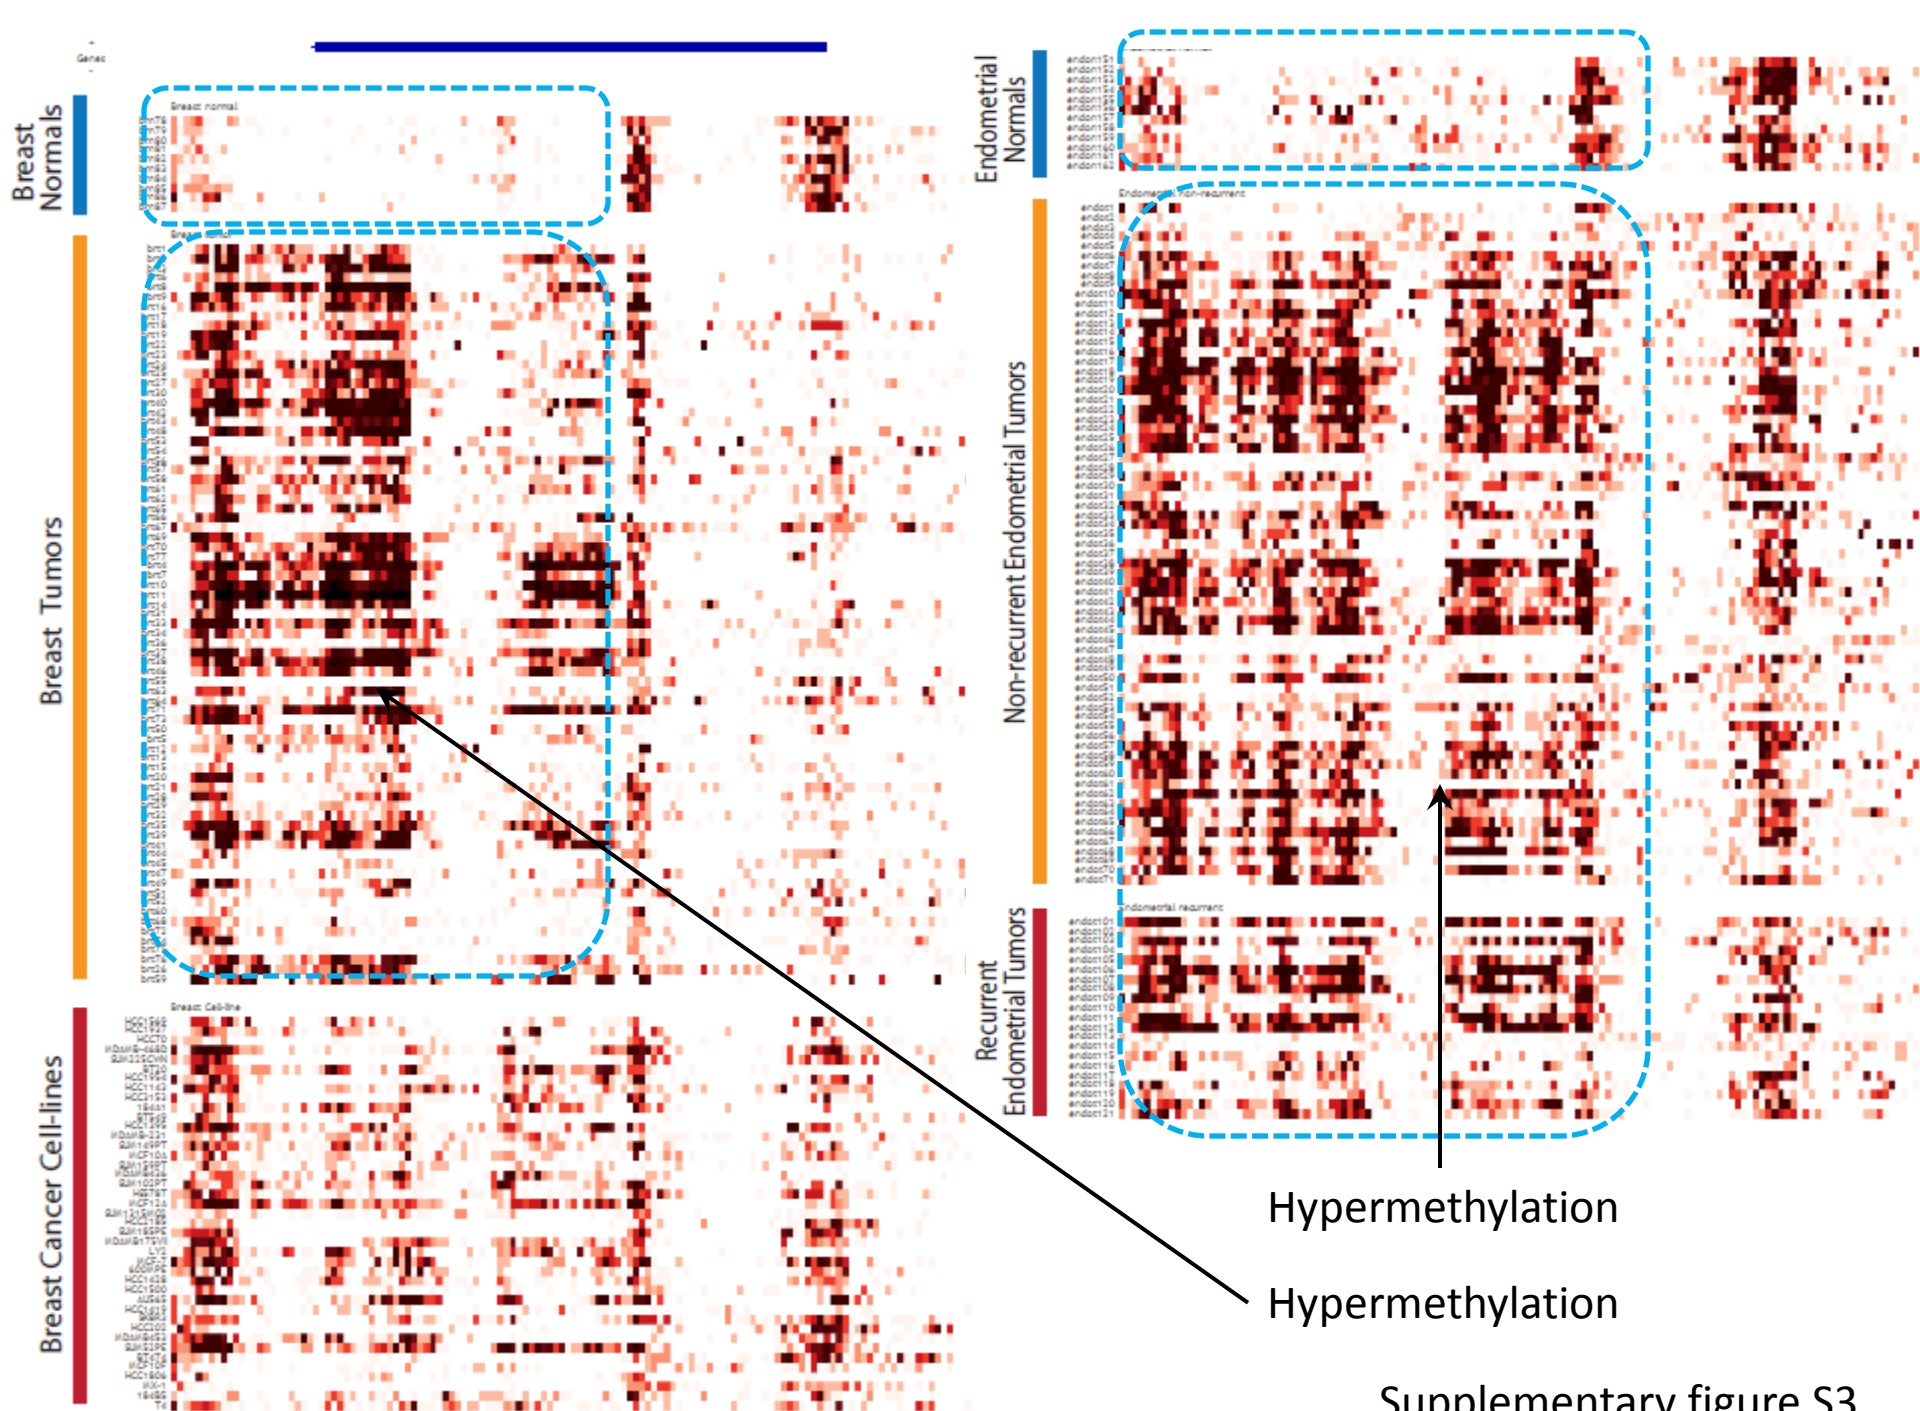

Supplement: pone.0060980.s003.pdf [file pone.0060980.s003.pdf]
